# Supplementary material for: The Fitness Cost of Antibiotic Resistance in Streptococcus pneumoniae: Insight from the Field
Source: PLOS journal article supplement (doi:10.1371/journal.pone.0029407), 2012-01-17
Supplement: S1 (10.1371/journal.pone.0029407.s001) [file journal.pone.0029407.s001]

## Supporting Information

In each village, we let  $X$  be the number of 1-5 year-old children uninfected with pneumococcus,  $I$  be the number infected with *ermB*,  $J$  be the number infected with *mefA/E*, and  $K$  be the number infected with azithromycin-sensitive strains. We then modeled  $P(X(t) = x, I(t) = i, J(t) = j, K(t) = k)$ , with  $x + i + j + k = N$ , as a continuous-time Markov process. We represent this joint probability as  $p_{i,j,k}(t)$ . Observed values are denoted with the subscript *obs*.

### Calculating Initial Conditions

The posterior distribution for each village is given by the following formula:

$$p_{i,j,k|i_{obs},j_{obs},k_{obs}}(t_0) = \frac{\binom{i}{i_{obs}}\binom{j}{j_{obs}}\binom{k}{k_{obs}}\binom{x}{x_{obs}}}{\binom{50}{15}} p_{i,j,k}(t_{prior}) \bigg/ \sum_{i,j,k} \frac{\binom{i}{i_{obs}}\binom{j}{j_{obs}}\binom{k}{k_{obs}}\binom{x}{x_{obs}}}{\binom{50}{15}} p_{i,j,k}(t_{prior})$$

where 50 corresponds to the number of children per village, and 15 is the number of nasopharyngeal swabs collected in each village at each time point.

### Modeling Treatment

Let  $E$  be the treatment efficacy against *ermB* strains,  $M$  be the treatment efficacy against *mefA/E* strains, and  $S$  be the treatment efficacy against antibiotic sensitive pneumococcal strains. We can then model treatment as independent binomial draws, as shown in the following equation:

$$\begin{aligned} p_{i,j,k}(t+1) = & \dots \\ p_{i,j,k}(t) & \left( 1 - \sum_{l=0}^{(i-1)} \sum_{m=0}^{(j-1)} \sum_{p=0}^{(k-1)} \binom{i}{i-l} E^{i-l} (1-E)^l \binom{j}{j-m} M^{j-m} (1-M)^m \binom{k}{k-p} S^{k-p} (1-S)^p \right) \\ & + \sum_{x=i+1}^{(N-j-k)} \sum_{y=j+1}^{(N-x-k)} \sum_{z=k+1}^{(N-x-y)} p_{x,y,z}(t) \binom{x}{x-i} E^{x-i} (1-E)^i \binom{y}{y-j} M^{y-j} (1-M)^j \binom{z}{z-k} S^{z-k} (1-S)^k \end{aligned}$$

In other words, the probability of being in state  $p_{i,j,k}$  at time  $t+1$  is equal to the probability of being in that state at time  $t$ , times the probability of remaining in it, plus the total flow into that state from higher infection states.

## Differential Equations

$$\begin{aligned}
\frac{dp_{i,j,k}(t)}{dt} = & -p_{i,j,k}(t) \left( (N - i - j - k) \left( \frac{i}{N} \beta_{mef} + \frac{j}{N} \beta_{erm} + \frac{k}{N} \beta_s \right) + i\gamma_{mef} + j\gamma_{erm} + k\gamma_s \right) \\
& + p_{i-1,j,k}(t) (N - (i-1) - j - k) \left( \frac{i-1}{N} \right) \beta_{mef} \\
& + p_{i,j-1,k}(t) (N - i - (j-1) - k) \left( \frac{j-1}{N} \right) \beta_{erm} \\
& + p_{i,j,k-1}(t) (N - i - j - (k-1)) \left( \frac{k-1}{N} \right) \beta_s \\
& + p_{i+1,j,k}(t) (i+1) \gamma \\
& + p_{i,j+1,k}(t) (j+1) \gamma \\
& + p_{i,j,k+1}(t) (k+1) \gamma,
\end{aligned}$$

where  $\beta_{mef}$ ,  $\beta_{erm}$ , and  $\beta_s$  denote the transmission coefficients for each strain.

## Calculating the Joint Likelihood

Let  $v$  be the index corresponding to each village, and let  $i, j, k$ , and  $x$  be the predicted number of children in each of the 4 groups under the model. Let  $i_{obs}$ ,  $j_{obs}$ ,  $k_{obs}$ , and  $x_{obs}$  be the number of children observed to be in each group by analysis of nasopharangeal swabs, and  $\theta$  be the vector of model parameters. Then, the joint likelihood of the observations under the model can be calculated by:

$$\mathcal{L}(\theta|data) = \prod_{v=1}^8 \prod_{t \in (36,42,54)} \left( \sum_{i,j,k} p_{i,j,k|\theta}(v,t) * \mathcal{S}(v,t) \right)$$

where  $\mathcal{S}(v,t)$  is the probability of the observed samples, given  $i$ ,  $j$ , and  $k$ :

$$\mathcal{S}(v,t) = \frac{\binom{i}{i_{obs}(v,t)} \binom{j}{j_{obs}(v,t)} \binom{k}{k_{obs}(v,t)} \binom{x}{x_{obs}(v,t)}}{\binom{50}{15}}$$
